# Supplementary material for: Multi-Data Integration Towards a Global Understanding of the Neurological Impact of Human Brain Severe Acute Respiratory Syndrome Coronavirus 2 Infection
Source: Front Integr Neurosci. 2022 Jul 13;16:756604. doi: 10.3389/fnint.2022.756604 (PMC9326261; doi:10.3389/fnint.2022.756604)
Supplement: Supplementary file 1 [file Table_1.XLSX]

## Sheet: Feuille 1
Supplementary Material
Supplementary Tables
ACE2 regions	TMPRSS2 regions
Left Cerebrum.Sub-lobar.Lentiform Nucleus.Gray Matter.Putamen	Right Brainstem.Pons.*.*.*
Left Cerebrum.Sub-lobar.Claustrum.Gray Matter.*	Left Cerebrum.Sub-lobar.Claustrum.Gray Matter.*
Right Cerebrum.Sub-lobar.Lentiform Nucleus.Gray Matter.Putamen	Right Cerebrum.Sub-lobar.Lentiform Nucleus.Gray Matter.Putamen
Left Cerebrum.Sub-lobar.Extra-Nuclear.White Matter.*	Left Brainstem.Pons.*.*.*
Right Brainstem.Pons.*.*.*	Right Cerebrum.Sub-lobar.Claustrum.Gray Matter.*
Right Cerebrum.Sub-lobar.Extra-Nuclear.White Matter.*	Left Cerebrum.Sub-lobar.Lentiform Nucleus.Gray Matter.Putamen
Left Cerebrum.Sub-lobar.Insula.White Matter.*	Left Cerebrum.Sub-lobar.Insula.White Matter.*
Left Cerebrum.Sub-lobar.*.Gray Matter.Amygdala	Left Cerebrum.Sub-lobar.Extra-Nuclear.White Matter.*
Right Brainstem.Medulla.*.*.*	Left Cerebrum.Sub-lobar.*.Gray Matter.Amygdala
Right Cerebrum.Sub-lobar.Claustrum.Gray Matter.*	Right Cerebrum.Sub-lobar.Extra-Nuclear.White Matter.*
Right Cerebrum.Sub-lobar.Caudate.Gray Matter.Caudate Body	Left Cerebrum.Limbic Lobe.Sub-Gyral.Gray Matter.Brodmann area 28
Left Brainstem.Medulla.*.*.*	Left Cerebrum.Temporal Lobe.Sub-Gyral.Gray Matter.Hippocampus
Left Brainstem.Pons.*.*.*	Left Brainstem.Midbrain.*.*.*
Left Cerebellum.Sub-lobar.Fourth Ventricle.Cerebro-Spinal Fluid.*	Right Cerebrum.Sub-lobar.Lentiform Nucleus.Gray Matter.Lateral Globus Pallidus
Left Brainstem.Midbrain.*.*.*	Left Cerebrum.Limbic Lobe.Parahippocampal Gyrus.White Matter.*
Left Cerebrum.Limbic Lobe.Sub-Gyral.Gray Matter.Brodmann area 28	Left Brainstem.Medulla.*.*.*
Left Brainstem.Midbrain.Extra-Nuclear.White Matter.*	Left Cerebrum.Limbic Lobe.Parahippocampal Gyrus.Gray Matter.Hippocampus
Right Cerebrum.Sub-lobar.Thalamus.Gray Matter.*	Right Brainstem.Midbrain.*.*.*
Left Cerebrum.Limbic Lobe.Parahippocampal Gyrus.Gray Matter.Brodmann area 28	Left Cerebrum.Limbic Lobe.Parahippocampal Gyrus.Gray Matter.Brodmann area 28
Left Cerebrum.Limbic Lobe.Cingulate Gyrus.White Matter.*	Left Cerebrum.Frontal Lobe.Superior Frontal Gyrus.Gray Matter.Brodmann area 6
Left Cerebrum.Limbic Lobe.Sub-Gyral.White Matter.*	Left Cerebellum.Sub-lobar.Fourth Ventricle.Cerebro-Spinal Fluid.*
Right Cerebrum.Sub-lobar.Lentiform Nucleus.Gray Matter.Lateral Globus Pallidus	Right Cerebrum.Sub-lobar.Lentiform Nucleus.Gray Matter.*
Left Cerebrum.Sub-lobar.Lentiform Nucleus.Gray Matter.Lateral Globus Pallidus	Right Cerebrum.Sub-lobar.Insula.White Matter.*
Right Cerebellum.Sub-lobar.Fourth Ventricle.Cerebro-Spinal Fluid.*	Left Cerebrum.Frontal Lobe.Superior Frontal Gyrus.*.*
Right Cerebrum.Sub-lobar.Insula.White Matter.*	Left Cerebrum.Limbic Lobe.Sub-Gyral.Gray Matter.Hippocampus
Left Cerebrum.Limbic Lobe.Parahippocampal Gyrus.White Matter.*	Right Cerebrum.Sub-lobar.Thalamus.Gray Matter.*
Right Brainstem.Midbrain.*.*.*	Right Cerebellum.Sub-lobar.Fourth Ventricle.Cerebro-Spinal Fluid.*
Right Cerebrum.Sub-lobar.Lateral Ventricle.Cerebro-Spinal Fluid.*	Right Cerebrum.Temporal Lobe.Superior Temporal Gyrus.Gray Matter.Brodmann area 22
Left Brainstem.Midbrain.*.Gray Matter.Red Nucleus	Left Cerebrum.Sub-lobar.Extra-Nuclear.White Matter.Optic Tract
Left Cerebrum.Sub-lobar.Lentiform Nucleus.Gray Matter.*	Left Cerebrum.Sub-lobar.Insula.Gray Matter.Brodmann area 13
Right Cerebrum.Sub-lobar.Thalamus.Gray Matter.Ventral Posterior Lateral Nucleus	Left Cerebrum.Limbic Lobe.Cingulate Gyrus.Gray Matter.Brodmann area 24
Right Cerebrum.Sub-lobar.Lentiform Nucleus.Gray Matter.*	Left Brainstem.Midbrain.Extra-Nuclear.White Matter.*
Right Cerebrum.Sub-lobar.Caudate.Gray Matter.Caudate Tail	Left Cerebrum.Sub-lobar.Caudate.Gray Matter.Caudate Body
Left Cerebrum.Temporal Lobe.Sub-Gyral.Gray Matter.Hippocampus	Left Cerebrum.Frontal Lobe.Superior Frontal Gyrus.White Matter.*
Left Cerebrum.Sub-lobar.Caudate.Gray Matter.Caudate Body	Right Cerebrum.Temporal Lobe.Superior Temporal Gyrus.*.*
Left Cerebrum.Sub-lobar.Extra-Nuclear.White Matter.Optic Tract	Right Cerebrum.Parietal Lobe.Inferior Parietal Lobule.White Matter.*
Left Cerebrum.Sub-lobar.Thalamus.Gray Matter.*	Right Cerebrum.Parietal Lobe.Inferior Parietal Lobule.Gray Matter.Brodmann area 40
Right Brainstem.Midbrain.Extra-Nuclear.White Matter.*	Left Cerebrum.Limbic Lobe.Parahippocampal Gyrus.Gray Matter.Brodmann area 35
Right Cerebrum.Parietal Lobe.Inferior Parietal Lobule.White Matter.*	Left Brainstem.Midbrain.*.Gray Matter.Red Nucleus
Right Cerebrum.Parietal Lobe.Inferior Parietal Lobule.Gray Matter.Brodmann area 40	Right Cerebrum.Temporal Lobe.Fusiform Gyrus.Gray Matter.Brodmann area 36
Right Cerebrum.Sub-lobar.Extra-Nuclear.White Matter.Putamen	Right Cerebrum.Sub-lobar.Caudate.Gray Matter.Caudate Body
Left Cerebrum.Limbic Lobe.Parahippocampal Gyrus.Gray Matter.Brodmann area 35	Left Cerebrum.Parietal Lobe.Postcentral Gyrus.Gray Matter.Brodmann area 40
Right Cerebrum.Parietal Lobe.Superior Parietal Lobule.Gray Matter.Brodmann area 7	Right Cerebrum.Limbic Lobe.Cingulate Gyrus.Gray Matter.Brodmann area 23
Left Cerebrum.Temporal Lobe.Fusiform Gyrus.Gray Matter.Brodmann area 37	Left Cerebrum.Sub-lobar.*.Gray Matter.Lateral Geniculum Body
Right Cerebrum.Temporal Lobe.Fusiform Gyrus.Gray Matter.Brodmann area 36	Left Cerebrum.Frontal Lobe.Precentral Gyrus.White Matter.*
Left Cerebellum.Anterior Lobe.*.Gray Matter.*	Right Cerebrum.Occipital Lobe.*.*.*
Right Cerebrum.Sub-lobar.Thalamus.Gray Matter.Ventral Posterior Medial Nucleus	Left Cerebrum.Temporal Lobe.Superior Temporal Gyrus.Gray Matter.Brodmann area 41
Right Cerebrum.Frontal Lobe.Precentral Gyrus.*.*	Left Cerebrum.Parietal Lobe.Postcentral Gyrus.*.*
Left Cerebrum.Limbic Lobe.Parahippocampal Gyrus.Gray Matter.Hippocampus	Left Cerebrum.Frontal Lobe.Superior Frontal Gyrus.Gray Matter.Brodmann area 8
Left Cerebrum.Limbic Lobe.Sub-Gyral.Gray Matter.Hippocampus	Right Brainstem.Medulla.*.*.*
Left Cerebrum.Sub-lobar.Insula.Gray Matter.Brodmann area 13	Left Cerebrum.Limbic Lobe.Parahippocampal Gyrus.*.*
Left Cerebrum.Sub-lobar.Lateral Ventricle.Cerebro-Spinal Fluid.*	Left Cerebrum.Limbic Lobe.Cingulate Gyrus.White Matter.*
Right Cerebellum.Posterior Lobe.Inferior Semi-Lunar Lobule.Gray Matter.*	Right Cerebrum.Sub-lobar.Thalamus.Gray Matter.Ventral Lateral Nucleus
Left Cerebrum.Occipital Lobe.Superior Occipital Gyrus.White Matter.*	Left Cerebrum.Temporal Lobe.Extra-Nuclear.White Matter.*
Left Cerebellum.Anterior Lobe.Fastigium.Gray Matter.*	Left Cerebellum.Anterior Lobe.Fastigium.Gray Matter.*
Left Cerebrum.Occipital Lobe.Superior Occipital Gyrus.Gray Matter.Brodmann area 19	Right Cerebrum.Parietal Lobe.Postcentral Gyrus.Gray Matter.Brodmann area 1
Left Cerebrum.Limbic Lobe.Parahippocampal Gyrus.*.*	Right Cerebrum.Temporal Lobe.Sub-Gyral.Gray Matter.Hippocampus
Right Cerebrum.Frontal Lobe.Superior Frontal Gyrus.White Matter.*	Left Cerebrum.Sub-lobar.Extra-Nuclear.White Matter.Putamen
Right Cerebrum.Temporal Lobe.Sub-Gyral.Gray Matter.Hippocampus	Left Cerebellum.Anterior Lobe.Nodule.Gray Matter.*
Left Cerebellum.Anterior Lobe.Nodule.Gray Matter.*	Right Cerebrum.Sub-lobar.Thalamus.Gray Matter.Ventral Posterior Lateral Nucleus
Right Cerebellum.Posterior Lobe.Pyramis.Gray Matter.*	Right Cerebellum.Anterior Lobe.Culmen.Gray Matter.*
Left Cerebrum.Frontal Lobe.Superior Frontal Gyrus.Gray Matter.Brodmann area 6	Right Cerebellum.Anterior Lobe.Nodule.Gray Matter.*
Right Cerebrum.*.*.Cerebro-Spinal Fluid.Optic Tract	Right Cerebrum.Sub-lobar.Thalamus.Gray Matter.Mammillary Body
Inter-Hemispheric.Sub-lobar.Extra-Nuclear.Cerebro-Spinal Fluid.Optic Tract	Left Cerebrum.Frontal Lobe.Precentral Gyrus.Gray Matter.Brodmann area 6
Left Cerebrum.Parietal Lobe.Inferior Parietal Lobule.Gray Matter.Brodmann area 7	Right Brainstem.Midbrain.*.Gray Matter.Red Nucleus
Right Cerebellum.Anterior Lobe.Nodule.Gray Matter.*	Left Cerebrum.Parietal Lobe.Inferior Parietal Lobule.Gray Matter.Brodmann area 40
Right Cerebrum.Sub-lobar.Thalamus.Gray Matter.Mammillary Body	Left Cerebellum.Posterior Lobe.Declive of Vermis.Gray Matter.*
Right Cerebrum.Temporal Lobe.Superior Temporal Gyrus.*.*	Left Cerebrum.Parietal Lobe.Superior Parietal Lobule.Gray Matter.Brodmann area 7
Right Cerebrum.Sub-lobar.Caudate.Gray Matter.Caudate Head	Right Cerebrum.Limbic Lobe.Parahippocampal Gyrus.Gray Matter.Brodmann area 36
Left Cerebellum.Anterior Lobe.Culmen.Gray Matter.*	Left Cerebrum.Limbic Lobe.*.*.*
Right Cerebrum.Frontal Lobe.Inferior Frontal Gyrus.Gray Matter.Brodmann area 44	Left Cerebrum.Occipital Lobe.Cuneus.Gray Matter.Brodmann area 30
Right Cerebrum.*.Thalamus.Gray Matter.*	Left Cerebrum.Sub-lobar.Lateral Ventricle.Cerebro-Spinal Fluid.*
Left Cerebrum.Sub-lobar.Thalamus.Gray Matter.Ventral Posterior Lateral Nucleus	Left Cerebrum.Limbic Lobe.Parahippocampal Gyrus.Gray Matter.Brodmann area 27
Left Cerebrum.Occipital Lobe.Superior Occipital Gyrus.*.*	Left Cerebrum.Parietal Lobe.Postcentral Gyrus.Gray Matter.Brodmann area 3
Right Cerebrum.Sub-lobar.Thalamus.Gray Matter.Ventral Lateral Nucleus	Right Cerebrum.Limbic Lobe.Parahippocampal Gyrus.Gray Matter.Hippocampus
Left Cerebrum.Temporal Lobe.Middle Occipital Gyrus.Gray Matter.Brodmann area 19	Right Cerebrum.Temporal Lobe.Superior Temporal Gyrus.Gray Matter.Brodmann area 21
Right Cerebrum.Frontal Lobe.Precentral Gyrus.Gray Matter.Brodmann area 6	Right Cerebrum.Parietal Lobe.Postcentral Gyrus.*.*
Left Cerebellum.Posterior Lobe.Declive of Vermis.Gray Matter.*	Left Cerebrum.Limbic Lobe.Parahippocampal Gyrus.Gray Matter.Amygdala
Right Cerebellum.Anterior Lobe.Culmen.Gray Matter.*	Right Cerebrum.Temporal Lobe.Superior Temporal Gyrus.Gray Matter.*
Right Brainstem.Midbrain.*.Gray Matter.Medial Geniculum Body	Right Cerebrum.Parietal Lobe.Precentral Gyrus.*.*
Left Cerebrum.Sub-lobar.Thalamus.Gray Matter.Ventral Posterior Medial Nucleus	Right Cerebrum.Occipital Lobe.Cuneus.Gray Matter.Brodmann area 18
Left Cerebrum.Sub-lobar.Extra-Nuclear.Cerebro-Spinal Fluid.Optic Tract	Left Cerebellum.Anterior Lobe.Culmen.Gray Matter.*
Right Cerebrum.Temporal Lobe.Superior Temporal Gyrus.Gray Matter.Brodmann area 22	Left Cerebrum.Frontal Lobe.Precentral Gyrus.Gray Matter.Brodmann area 4
Right Cerebrum.Frontal Lobe.Superior Frontal Gyrus.Gray Matter.Brodmann area 10	Right Cerebrum.Limbic Lobe.Parahippocampal Gyrus.White Matter.*
Left Cerebrum.Frontal Lobe.Orbital Gyrus.White Matter.*	Inter-Hemispheric.*.*.*.*
Left Cerebrum.Sub-lobar.*.Gray Matter.Lateral Geniculum Body	Left Cerebrum.Sub-lobar.Insula.Gray Matter.*
Left Cerebrum.Limbic Lobe.Parahippocampal Gyrus.Gray Matter.Amygdala	Left Cerebellum.Anterior Lobe.*.Gray Matter.*
Left Cerebrum.Sub-lobar.Extra-Nuclear.White Matter.Putamen	Right Brainstem.Midbrain.Extra-Nuclear.White Matter.*
Left Cerebrum.Limbic Lobe.Cingulate Gyrus.Gray Matter.Brodmann area 23	*.*.Precuneus.*.*
Left Cerebrum.Sub-lobar.Insula.Gray Matter.*	Right Cerebrum.Parietal Lobe.Postcentral Gyrus.Gray Matter.Brodmann area 43
Left Cerebrum.Limbic Lobe.Parahippocampal Gyrus.Gray Matter.Brodmann area 27	Left Cerebrum.Limbic Lobe.Uncus.Gray Matter.Brodmann area 20
Left Cerebrum.Sub-lobar.Third Ventricle.Cerebro-Spinal Fluid.*	Right Cerebrum.Limbic Lobe.Parahippocampal Gyrus.*.*
Left Cerebrum.Sub-lobar.Thalamus.Gray Matter.Mammillary Body	Right Cerebrum.Frontal Lobe.Superior Frontal Gyrus.Gray Matter.Brodmann area 10
*.*.Precuneus.*.*	Right Cerebrum.*.*.*.*
Left Cerebrum.Frontal Lobe.Superior Frontal Gyrus.White Matter.*	Left Cerebellum.Anterior Lobe.Cerebellar Lingual.Gray Matter.*
Left Cerebrum.Limbic Lobe.Cingulate Gyrus.Gray Matter.Brodmann area 24	Right Cerebrum.Frontal Lobe.Middle Frontal Gyrus.Gray Matter.Brodmann area 10
Right Cerebellum.Anterior Lobe.*.Gray Matter.*	Right Cerebrum.Temporal Lobe.Superior Temporal Gyrus.White Matter.*
Inter-Hemispheric.*.*.Cerebro-Spinal Fluid.Optic Tract	Right Cerebrum.Parietal Lobe.Precuneus.Gray Matter.Brodmann area 7
Left Cerebellum.Anterior Lobe.Cerebellar Lingual.Gray Matter.*	Left Cerebrum.Frontal Lobe.Superior Frontal Gyrus.Gray Matter.Brodmann area 9
Right Cerebrum.Sub-lobar.Thalamus.Gray Matter.Pulvinar	Left Cerebrum.Parietal Lobe.Precuneus.*.*
	Supplementary Table 1. Regions where ACE2 and TMPRSS2 mRNAs are overexpressed

## Sheet: Sheet2
1	Right Brainstem.Pons.*.*.*	13					*.*.Precuneus.*.*	*.*.Precuneus.*.*
2	Left Cerebrum.Sub-lobar.Claustrum.Gray Matter.*	10					Inter-Hemispheric.*.*.*.*		Inter-Hemispheric.*.*.Cerebro-Spinal Fluid.Optic Tract
3	Right Cerebrum.Sub-lobar.Lentiform Nucleus.Gray Matter.Putamen	10					Left Brainstem.Medulla.*.*.*	Left Brainstem.Medulla.*.*.*	Inter-Hemispheric.Sub-lobar.Extra-Nuclear.Cerebro-Spinal Fluid.Optic Tract
4	Left Brainstem.Pons.*.*.*	8					Left Brainstem.Midbrain.*.*.*	Left Brainstem.Midbrain.*.*.*
5	Right Cerebrum.Sub-lobar.Claustrum.Gray Matter.*	8					Left Brainstem.Midbrain.*.Gray Matter.Red Nucleus	Left Brainstem.Midbrain.*.Gray Matter.Red Nucleus
6	Left Cerebrum.Sub-lobar.Lentiform Nucleus.Gray Matter.Putamen	8					Left Brainstem.Midbrain.Extra-Nuclear.White Matter.*	Left Brainstem.Midbrain.Extra-Nuclear.White Matter.*
7	Left Cerebrum.Sub-lobar.Insula.White Matter.*	8					Left Brainstem.Pons.*.*.*	Left Brainstem.Pons.*.*.*
8	Left Cerebrum.Sub-lobar.Extra-Nuclear.White Matter.*	7					Left Cerebellum.Anterior Lobe.*.Gray Matter.*	Left Cerebellum.Anterior Lobe.*.Gray Matter.*
9	Left Cerebrum.Sub-lobar.*.Gray Matter.Amygdala	7					Left Cerebellum.Anterior Lobe.Cerebellar Lingual.Gray Matter.*	Left Cerebellum.Anterior Lobe.Cerebellar Lingual.Gray Matter.*
10	Right Cerebrum.Sub-lobar.Extra-Nuclear.White Matter.*	7					Left Cerebellum.Anterior Lobe.Culmen.Gray Matter.*	Left Cerebellum.Anterior Lobe.Culmen.Gray Matter.*
11	Left Cerebrum.Limbic Lobe.Sub-Gyral.Gray Matter.Brodmann area 28	6					Left Cerebellum.Anterior Lobe.Fastigium.Gray Matter.*	Left Cerebellum.Anterior Lobe.Fastigium.Gray Matter.*
12	Left Cerebrum.Temporal Lobe.Sub-Gyral.Gray Matter.Hippocampus	6					Left Cerebellum.Anterior Lobe.Nodule.Gray Matter.*	Left Cerebellum.Anterior Lobe.Nodule.Gray Matter.*
13	Left Brainstem.Midbrain.*.*.*	6					Left Cerebellum.Posterior Lobe.Declive of Vermis.Gray Matter.*	Left Cerebellum.Posterior Lobe.Declive of Vermis.Gray Matter.*
14	Right Cerebrum.Sub-lobar.Lentiform Nucleus.Gray Matter.Lateral Globus Pallidus	5					Left Cerebellum.Sub-lobar.Fourth Ventricle.Cerebro-Spinal Fluid.*	Left Cerebellum.Sub-lobar.Fourth Ventricle.Cerebro-Spinal Fluid.*
15	Left Cerebrum.Limbic Lobe.Parahippocampal Gyrus.White Matter.*	5					Left Cerebrum.Frontal Lobe.Precentral Gyrus.Gray Matter.Brodmann area 4		Left Cerebrum.Frontal Lobe.Orbital Gyrus.White Matter.*
16	Left Brainstem.Medulla.*.*.*	5					Left Cerebrum.Frontal Lobe.Precentral Gyrus.Gray Matter.Brodmann area 6	Left Cerebrum.Frontal Lobe.Superior Frontal Gyrus.Gray Matter.Brodmann area 6
17	Left Cerebrum.Limbic Lobe.Parahippocampal Gyrus.Gray Matter.Hippocampus	5					Left Cerebrum.Frontal Lobe.Precentral Gyrus.White Matter.*	Left Cerebrum.Frontal Lobe.Superior Frontal Gyrus.White Matter.*
18	Right Brainstem.Midbrain.*.*.*	5					Left Cerebrum.Frontal Lobe.Superior Frontal Gyrus.*.*	Left Cerebrum.Limbic Lobe.Cingulate Gyrus.White Matter.*	Left Cerebrum.Limbic Lobe.Cingulate Gyrus.Gray Matter.Brodmann area 23
19	Left Cerebrum.Limbic Lobe.Parahippocampal Gyrus.Gray Matter.Brodmann area 28	5					Left Cerebrum.Frontal Lobe.Superior Frontal Gyrus.Gray Matter.Brodmann area 6	Left Cerebrum.Limbic Lobe.Parahippocampal Gyrus.*.*	Left Cerebrum.Limbic Lobe.Cingulate Gyrus.Gray Matter.Brodmann area 24
20	Left Cerebrum.Frontal Lobe.Superior Frontal Gyrus.Gray Matter.Brodmann area 6	5					Left Cerebrum.Frontal Lobe.Superior Frontal Gyrus.Gray Matter.Brodmann area 8	Left Cerebrum.Limbic Lobe.Parahippocampal Gyrus.Gray Matter.Amygdala
21	Left Cerebellum.Sub-lobar.Fourth Ventricle.Cerebro-Spinal Fluid.*	5					Left Cerebrum.Frontal Lobe.Superior Frontal Gyrus.Gray Matter.Brodmann area 9	Left Cerebrum.Limbic Lobe.Parahippocampal Gyrus.Gray Matter.Brodmann area 27
22	Right Cerebrum.Sub-lobar.Lentiform Nucleus.Gray Matter.*	5					Left Cerebrum.Frontal Lobe.Superior Frontal Gyrus.White Matter.*	Left Cerebrum.Limbic Lobe.Parahippocampal Gyrus.Gray Matter.Brodmann area 28
23	Right Cerebrum.Sub-lobar.Insula.White Matter.*	5					Left Cerebrum.Limbic Lobe.*.*.*	Left Cerebrum.Limbic Lobe.Parahippocampal Gyrus.Gray Matter.Brodmann area 35
24	Left Cerebrum.Frontal Lobe.Superior Frontal Gyrus.*.*	5					Left Cerebrum.Limbic Lobe.Cingulate Gyrus.Gray Matter.Brodmann area 24	Left Cerebrum.Limbic Lobe.Parahippocampal Gyrus.Gray Matter.Hippocampus
25	Left Cerebrum.Limbic Lobe.Sub-Gyral.Gray Matter.Hippocampus	4					Left Cerebrum.Limbic Lobe.Cingulate Gyrus.White Matter.*	Left Cerebrum.Limbic Lobe.Parahippocampal Gyrus.White Matter.*
26	Right Cerebrum.Sub-lobar.Thalamus.Gray Matter.*	4					Left Cerebrum.Limbic Lobe.Parahippocampal Gyrus.*.*	Left Cerebrum.Limbic Lobe.Sub-Gyral.Gray Matter.Brodmann area 28
27	Right Cerebellum.Sub-lobar.Fourth Ventricle.Cerebro-Spinal Fluid.*	4					Left Cerebrum.Limbic Lobe.Parahippocampal Gyrus.Gray Matter.Amygdala	Left Cerebrum.Limbic Lobe.Sub-Gyral.Gray Matter.Hippocampus
28	Right Cerebrum.Temporal Lobe.Superior Temporal Gyrus.Gray Matter.Brodmann area 22	4					Left Cerebrum.Limbic Lobe.Parahippocampal Gyrus.Gray Matter.Brodmann area 27	Left Cerebrum.Limbic Lobe.Sub-Gyral.White Matter.*
29	Left Cerebrum.Sub-lobar.Extra-Nuclear.White Matter.Optic Tract	4					Left Cerebrum.Limbic Lobe.Parahippocampal Gyrus.Gray Matter.Brodmann area 28	Left Cerebrum.Occipital Lobe.Superior Occipital Gyrus.*.*
30	Left Cerebrum.Sub-lobar.Insula.Gray Matter.Brodmann area 13	4					Left Cerebrum.Limbic Lobe.Parahippocampal Gyrus.Gray Matter.Brodmann area 35	Left Cerebrum.Occipital Lobe.Superior Occipital Gyrus.Gray Matter.Brodmann area 19
31	Left Cerebrum.Limbic Lobe.Cingulate Gyrus.Gray Matter.Brodmann area 24	4					Left Cerebrum.Limbic Lobe.Parahippocampal Gyrus.Gray Matter.Hippocampus	Left Cerebrum.Occipital Lobe.Superior Occipital Gyrus.White Matter.*
32	Left Brainstem.Midbrain.Extra-Nuclear.White Matter.*	4					Left Cerebrum.Limbic Lobe.Parahippocampal Gyrus.White Matter.*	Left Cerebrum.Parietal Lobe.Inferior Parietal Lobule.Gray Matter.Brodmann area 7
33	Left Cerebrum.Sub-lobar.Caudate.Gray Matter.Caudate Body	3					Left Cerebrum.Limbic Lobe.Sub-Gyral.Gray Matter.Brodmann area 28	Left Cerebrum.Sub-lobar.*.Gray Matter.Amygdala
34	Left Cerebrum.Frontal Lobe.Superior Frontal Gyrus.White Matter.*	3					Left Cerebrum.Limbic Lobe.Sub-Gyral.Gray Matter.Hippocampus	Left Cerebrum.Sub-lobar.*.Gray Matter.Lateral Geniculum Body
35	Right Cerebrum.Temporal Lobe.Superior Temporal Gyrus.*.*	3					Left Cerebrum.Limbic Lobe.Uncus.Gray Matter.Brodmann area 20	Left Cerebrum.Sub-lobar.Caudate.Gray Matter.Caudate Body
36	Right Cerebrum.Parietal Lobe.Inferior Parietal Lobule.White Matter.*	3					Left Cerebrum.Occipital Lobe.Cuneus.Gray Matter.Brodmann area 30	Left Cerebrum.Sub-lobar.Claustrum.Gray Matter.*
37	Right Cerebrum.Parietal Lobe.Inferior Parietal Lobule.Gray Matter.Brodmann area 40	3					Left Cerebrum.Parietal Lobe.Inferior Parietal Lobule.Gray Matter.Brodmann area 40	Left Cerebrum.Sub-lobar.Extra-Nuclear.Cerebro-Spinal Fluid.Optic Tract
38	Left Cerebrum.Limbic Lobe.Parahippocampal Gyrus.Gray Matter.Brodmann area 35	3					Left Cerebrum.Parietal Lobe.Postcentral Gyrus.*.*	Left Cerebrum.Sub-lobar.Extra-Nuclear.White Matter.*
39	Left Brainstem.Midbrain.*.Gray Matter.Red Nucleus	3					Left Cerebrum.Parietal Lobe.Postcentral Gyrus.Gray Matter.Brodmann area 3	Left Cerebrum.Sub-lobar.Extra-Nuclear.White Matter.Optic Tract
40	Right Cerebrum.Temporal Lobe.Fusiform Gyrus.Gray Matter.Brodmann area 36	3					Left Cerebrum.Parietal Lobe.Postcentral Gyrus.Gray Matter.Brodmann area 40	Left Cerebrum.Sub-lobar.Extra-Nuclear.White Matter.Putamen
41	Right Cerebrum.Sub-lobar.Caudate.Gray Matter.Caudate Body	3					Left Cerebrum.Parietal Lobe.Precuneus.*.*	Left Cerebrum.Sub-lobar.Insula.Gray Matter.*
42	Left Cerebrum.Parietal Lobe.Postcentral Gyrus.Gray Matter.Brodmann area 40	3					Left Cerebrum.Parietal Lobe.Superior Parietal Lobule.Gray Matter.Brodmann area 7	Left Cerebrum.Sub-lobar.Insula.Gray Matter.Brodmann area 13
43	Right Cerebrum.Limbic Lobe.Cingulate Gyrus.Gray Matter.Brodmann area 23	3					Left Cerebrum.Sub-lobar.*.Gray Matter.Amygdala	Left Cerebrum.Sub-lobar.Insula.White Matter.*
44	Left Cerebrum.Sub-lobar.*.Gray Matter.Lateral Geniculum Body	3					Left Cerebrum.Sub-lobar.*.Gray Matter.Lateral Geniculum Body	Left Cerebrum.Sub-lobar.Lateral Ventricle.Cerebro-Spinal Fluid.*
45	Left Cerebrum.Frontal Lobe.Precentral Gyrus.White Matter.*	3					Left Cerebrum.Sub-lobar.Caudate.Gray Matter.Caudate Body	Left Cerebrum.Sub-lobar.Lentiform Nucleus.Gray Matter.*
46	Right Cerebrum.Occipital Lobe.*.*.*	3					Left Cerebrum.Sub-lobar.Claustrum.Gray Matter.*	Left Cerebrum.Sub-lobar.Lentiform Nucleus.Gray Matter.Lateral Globus Pallidus
47	Left Cerebrum.Temporal Lobe.Superior Temporal Gyrus.Gray Matter.Brodmann area 41	3					Left Cerebrum.Sub-lobar.Extra-Nuclear.White Matter.*	Left Cerebrum.Sub-lobar.Lentiform Nucleus.Gray Matter.Putamen
48	Left Cerebrum.Parietal Lobe.Postcentral Gyrus.*.*	3					Left Cerebrum.Sub-lobar.Extra-Nuclear.White Matter.Optic Tract	Left Cerebrum.Sub-lobar.Thalamus.Gray Matter.*
49	Left Cerebrum.Frontal Lobe.Superior Frontal Gyrus.Gray Matter.Brodmann area 8	3					Left Cerebrum.Sub-lobar.Extra-Nuclear.White Matter.Putamen	Left Cerebrum.Sub-lobar.Thalamus.Gray Matter.Mammillary Body
50	Right Brainstem.Medulla.*.*.*	3					Left Cerebrum.Sub-lobar.Insula.Gray Matter.*	Left Cerebrum.Sub-lobar.Thalamus.Gray Matter.Ventral Posterior Lateral Nucleus
51	Left Cerebrum.Limbic Lobe.Parahippocampal Gyrus.*.*	3					Left Cerebrum.Sub-lobar.Insula.Gray Matter.Brodmann area 13	Left Cerebrum.Sub-lobar.Thalamus.Gray Matter.Ventral Posterior Medial Nucleus
52	Left Cerebrum.Limbic Lobe.Cingulate Gyrus.White Matter.*	3					Left Cerebrum.Sub-lobar.Insula.White Matter.*	Left Cerebrum.Sub-lobar.Third Ventricle.Cerebro-Spinal Fluid.*
53	Right Cerebrum.Sub-lobar.Thalamus.Gray Matter.Ventral Lateral Nucleus	2					Left Cerebrum.Sub-lobar.Lateral Ventricle.Cerebro-Spinal Fluid.*	Left Cerebrum.Temporal Lobe.Fusiform Gyrus.Gray Matter.Brodmann area 37
54	Left Cerebrum.Temporal Lobe.Extra-Nuclear.White Matter.*	2					Left Cerebrum.Sub-lobar.Lentiform Nucleus.Gray Matter.Putamen	Left Cerebrum.Temporal Lobe.Middle Occipital Gyrus.Gray Matter.Brodmann area 19
55	Left Cerebellum.Anterior Lobe.Fastigium.Gray Matter.*	2					Left Cerebrum.Temporal Lobe.Extra-Nuclear.White Matter.*	Left Cerebrum.Temporal Lobe.Sub-Gyral.Gray Matter.Hippocampus
56	Right Cerebrum.Parietal Lobe.Postcentral Gyrus.Gray Matter.Brodmann area 1	2					Left Cerebrum.Temporal Lobe.Sub-Gyral.Gray Matter.Hippocampus	Right Brainstem.Medulla.*.*.*
57	Right Cerebrum.Temporal Lobe.Sub-Gyral.Gray Matter.Hippocampus	2					Left Cerebrum.Temporal Lobe.Superior Temporal Gyrus.Gray Matter.Brodmann area 41	Right Brainstem.Midbrain.*.*.*
58	Left Cerebrum.Sub-lobar.Extra-Nuclear.White Matter.Putamen	2					Right Brainstem.Medulla.*.*.*	Right Brainstem.Midbrain.*.Gray Matter.Medial Geniculum Body
59	Left Cerebellum.Anterior Lobe.Nodule.Gray Matter.*	2					Right Brainstem.Midbrain.*.*.*	Right Brainstem.Midbrain.Extra-Nuclear.White Matter.*
60	Right Cerebrum.Sub-lobar.Thalamus.Gray Matter.Ventral Posterior Lateral Nucleus	2					Right Brainstem.Midbrain.*.Gray Matter.Red Nucleus	Right Brainstem.Pons.*.*.*
61	Right Cerebellum.Anterior Lobe.Culmen.Gray Matter.*	2					Right Brainstem.Midbrain.Extra-Nuclear.White Matter.*	Right Cerebellum.Anterior Lobe.*.Gray Matter.*
62	Right Cerebellum.Anterior Lobe.Nodule.Gray Matter.*	2					Right Brainstem.Pons.*.*.*	Right Cerebellum.Anterior Lobe.Culmen.Gray Matter.*
63	Right Cerebrum.Sub-lobar.Thalamus.Gray Matter.Mammillary Body	2					Right Cerebellum.Anterior Lobe.Culmen.Gray Matter.*	Right Cerebellum.Anterior Lobe.Nodule.Gray Matter.*
64	Left Cerebrum.Frontal Lobe.Precentral Gyrus.Gray Matter.Brodmann area 6	2					Right Cerebellum.Anterior Lobe.Nodule.Gray Matter.*	Right Cerebellum.Posterior Lobe.Inferior Semi-Lunar Lobule.Gray Matter.*
65	Right Brainstem.Midbrain.*.Gray Matter.Red Nucleus	2					Right Cerebellum.Sub-lobar.Fourth Ventricle.Cerebro-Spinal Fluid.*	Right Cerebellum.Posterior Lobe.Pyramis.Gray Matter.*
66	Left Cerebrum.Parietal Lobe.Inferior Parietal Lobule.Gray Matter.Brodmann area 40	2					Right Cerebrum.*.*.*.*	Right Cerebellum.Sub-lobar.Fourth Ventricle.Cerebro-Spinal Fluid.*
67	Left Cerebellum.Posterior Lobe.Declive of Vermis.Gray Matter.*	2					Right Cerebrum.Frontal Lobe.Middle Frontal Gyrus.Gray Matter.Brodmann area 10	Right Cerebrum.*.*.Cerebro-Spinal Fluid.Optic Tract
68	Left Cerebrum.Parietal Lobe.Superior Parietal Lobule.Gray Matter.Brodmann area 7	2					Right Cerebrum.Frontal Lobe.Superior Frontal Gyrus.Gray Matter.Brodmann area 10	Right Cerebrum.*.Thalamus.Gray Matter.*
69	Right Cerebrum.Limbic Lobe.Parahippocampal Gyrus.Gray Matter.Brodmann area 36	2					Right Cerebrum.Limbic Lobe.Cingulate Gyrus.Gray Matter.Brodmann area 23	Right Cerebrum.Frontal Lobe.Inferior Frontal Gyrus.Gray Matter.Brodmann area 44
70	Left Cerebrum.Limbic Lobe.*.*.*	2					Right Cerebrum.Limbic Lobe.Parahippocampal Gyrus.*.*	Right Cerebrum.Frontal Lobe.Precentral Gyrus.*.*
71	Left Cerebrum.Occipital Lobe.Cuneus.Gray Matter.Brodmann area 30	2					Right Cerebrum.Limbic Lobe.Parahippocampal Gyrus.Gray Matter.Brodmann area 36	Right Cerebrum.Frontal Lobe.Precentral Gyrus.Gray Matter.Brodmann area 6
72	Left Cerebrum.Sub-lobar.Lateral Ventricle.Cerebro-Spinal Fluid.*	2					Right Cerebrum.Limbic Lobe.Parahippocampal Gyrus.Gray Matter.Hippocampus	Right Cerebrum.Frontal Lobe.Superior Frontal Gyrus.Gray Matter.Brodmann area 10
73	Left Cerebrum.Limbic Lobe.Parahippocampal Gyrus.Gray Matter.Brodmann area 27	2					Right Cerebrum.Limbic Lobe.Parahippocampal Gyrus.White Matter.*	Right Cerebrum.Frontal Lobe.Superior Frontal Gyrus.White Matter.*
74	Left Cerebrum.Parietal Lobe.Postcentral Gyrus.Gray Matter.Brodmann area 3	2					Right Cerebrum.Occipital Lobe.*.*.*	Right Cerebrum.Parietal Lobe.Inferior Parietal Lobule.Gray Matter.Brodmann area 40
75	Right Cerebrum.Limbic Lobe.Parahippocampal Gyrus.Gray Matter.Hippocampus	2					Right Cerebrum.Occipital Lobe.Cuneus.Gray Matter.Brodmann area 18	Right Cerebrum.Parietal Lobe.Inferior Parietal Lobule.White Matter.*
76	Right Cerebrum.Temporal Lobe.Superior Temporal Gyrus.Gray Matter.Brodmann area 21	2					Right Cerebrum.Parietal Lobe.Inferior Parietal Lobule.Gray Matter.Brodmann area 40	Right Cerebrum.Parietal Lobe.Superior Parietal Lobule.Gray Matter.Brodmann area 7
77	Right Cerebrum.Parietal Lobe.Postcentral Gyrus.*.*	2					Right Cerebrum.Parietal Lobe.Inferior Parietal Lobule.White Matter.*	Right Cerebrum.Sub-lobar.Caudate.Gray Matter.Caudate Body
78	Left Cerebrum.Limbic Lobe.Parahippocampal Gyrus.Gray Matter.Amygdala	2					Right Cerebrum.Parietal Lobe.Postcentral Gyrus.*.*	Right Cerebrum.Sub-lobar.Caudate.Gray Matter.Caudate Head
79	Right Cerebrum.Temporal Lobe.Superior Temporal Gyrus.Gray Matter.*	2					Right Cerebrum.Parietal Lobe.Postcentral Gyrus.Gray Matter.Brodmann area 1	Right Cerebrum.Sub-lobar.Caudate.Gray Matter.Caudate Tail
80	Right Cerebrum.Parietal Lobe.Precentral Gyrus.*.*	2					Right Cerebrum.Parietal Lobe.Postcentral Gyrus.Gray Matter.Brodmann area 43	Right Cerebrum.Sub-lobar.Claustrum.Gray Matter.*
81	Right Cerebrum.Occipital Lobe.Cuneus.Gray Matter.Brodmann area 18	2					Right Cerebrum.Parietal Lobe.Precentral Gyrus.*.*	Right Cerebrum.Sub-lobar.Extra-Nuclear.White Matter.*
82	Left Cerebellum.Anterior Lobe.Culmen.Gray Matter.*	2					Right Cerebrum.Parietal Lobe.Precuneus.Gray Matter.Brodmann area 7	Right Cerebrum.Sub-lobar.Extra-Nuclear.White Matter.Putamen
83	Left Cerebrum.Frontal Lobe.Precentral Gyrus.Gray Matter.Brodmann area 4	2					Right Cerebrum.Sub-lobar.Caudate.Gray Matter.Caudate Body	Right Cerebrum.Sub-lobar.Insula.White Matter.*
84	Right Cerebrum.Limbic Lobe.Parahippocampal Gyrus.White Matter.*	2					Right Cerebrum.Sub-lobar.Claustrum.Gray Matter.*	Right Cerebrum.Sub-lobar.Lateral Ventricle.Cerebro-Spinal Fluid.*
85	Inter-Hemispheric.*.*.*.*	2					Right Cerebrum.Sub-lobar.Extra-Nuclear.White Matter.*	Right Cerebrum.Sub-lobar.Lentiform Nucleus.Gray Matter.*
86	Left Cerebrum.Sub-lobar.Insula.Gray Matter.*	2					Right Cerebrum.Sub-lobar.Insula.White Matter.*	Right Cerebrum.Sub-lobar.Lentiform Nucleus.Gray Matter.Lateral Globus Pallidus
87	Left Cerebellum.Anterior Lobe.*.Gray Matter.*	2					Right Cerebrum.Sub-lobar.Lentiform Nucleus.Gray Matter.*	Right Cerebrum.Sub-lobar.Lentiform Nucleus.Gray Matter.Putamen
88	Right Brainstem.Midbrain.Extra-Nuclear.White Matter.*	2					Right Cerebrum.Sub-lobar.Lentiform Nucleus.Gray Matter.Lateral Globus Pallidus	Right Cerebrum.Sub-lobar.Thalamus.Gray Matter.*
89	*.*.Precuneus.*.*	2					Right Cerebrum.Sub-lobar.Lentiform Nucleus.Gray Matter.Putamen	Right Cerebrum.Sub-lobar.Thalamus.Gray Matter.Mammillary Body
90	Right Cerebrum.Parietal Lobe.Postcentral Gyrus.Gray Matter.Brodmann area 43	2					Right Cerebrum.Sub-lobar.Thalamus.Gray Matter.*	Right Cerebrum.Sub-lobar.Thalamus.Gray Matter.Pulvinar
91	Left Cerebrum.Limbic Lobe.Uncus.Gray Matter.Brodmann area 20	2					Right Cerebrum.Sub-lobar.Thalamus.Gray Matter.Mammillary Body	Right Cerebrum.Sub-lobar.Thalamus.Gray Matter.Ventral Lateral Nucleus
92	Right Cerebrum.Limbic Lobe.Parahippocampal Gyrus.*.*	2					Right Cerebrum.Sub-lobar.Thalamus.Gray Matter.Ventral Lateral Nucleus	Right Cerebrum.Sub-lobar.Thalamus.Gray Matter.Ventral Posterior Lateral Nucleus
93	Right Cerebrum.Frontal Lobe.Superior Frontal Gyrus.Gray Matter.Brodmann area 10	2					Right Cerebrum.Sub-lobar.Thalamus.Gray Matter.Ventral Posterior Lateral Nucleus	Right Cerebrum.Sub-lobar.Thalamus.Gray Matter.Ventral Posterior Medial Nucleus
94	Right Cerebrum.*.*.*.*	2					Right Cerebrum.Temporal Lobe.Fusiform Gyrus.Gray Matter.Brodmann area 36	Right Cerebrum.Temporal Lobe.Fusiform Gyrus.Gray Matter.Brodmann area 36
95	Left Cerebellum.Anterior Lobe.Cerebellar Lingual.Gray Matter.*	2					Right Cerebrum.Temporal Lobe.Sub-Gyral.Gray Matter.Hippocampus	Right Cerebrum.Temporal Lobe.Sub-Gyral.Gray Matter.Hippocampus
96	Right Cerebrum.Frontal Lobe.Middle Frontal Gyrus.Gray Matter.Brodmann area 10	2					Right Cerebrum.Temporal Lobe.Superior Temporal Gyrus.*.*	Right Cerebrum.Temporal Lobe.Superior Temporal Gyrus.*.*
97	Right Cerebrum.Temporal Lobe.Superior Temporal Gyrus.White Matter.*	2					Right Cerebrum.Temporal Lobe.Superior Temporal Gyrus.Gray Matter.*	Right Cerebrum.Temporal Lobe.Superior Temporal Gyrus.Gray Matter.Brodmann area 22
98	Right Cerebrum.Parietal Lobe.Precuneus.Gray Matter.Brodmann area 7	2					Right Cerebrum.Temporal Lobe.Superior Temporal Gyrus.Gray Matter.Brodmann area 21	Supplementary Table 1. Regions where ACE2 mRNAs are overexpressed
99	Left Cerebrum.Frontal Lobe.Superior Frontal Gyrus.Gray Matter.Brodmann area 9	2					Right Cerebrum.Temporal Lobe.Superior Temporal Gyrus.Gray Matter.Brodmann area 22
100	Left Cerebrum.Parietal Lobe.Precuneus.*.*	2					Right Cerebrum.Temporal Lobe.Superior Temporal Gyrus.White Matter.*
